# Supplementary material for: N-Terminal Protease Gene Phylogeny Reveals the Potential for Novel Cyanobactin Diversity in Cyanobacteria
Source: PubMed Central journal article supplement (PMC3877893; doi:10.3390/md11124902), 2013-12-09
Supplement: marinedrugs-11-04902-s001.pdf [file marinedrugs-11-04902-s001.pdf]

## Supplementary Information

**Table S1.** Cyanobacterial isolates tested for the presence of cyanobactin *N*-terminal protease (A) gene.

| Order                                   | Isolates <sup>a</sup>                    | Habitat <sup>b</sup>                    | Origin <sup>c</sup>                        |                            |
|-----------------------------------------|------------------------------------------|-----------------------------------------|--------------------------------------------|----------------------------|
| Chroococcales                           | <i>Cyanobium</i> sp. LEGE 06012          | M                                       | Beach, Foz do Arelho, Portugal             |                            |
|                                         | <i>Cyanobium</i> sp. LEGE 06098          | M                                       | Beach, Martinhal, Portugal                 |                            |
|                                         | <i>Cyanobium</i> sp. LEGE 06127          | M                                       | Beach, Burgau, Portugal                    |                            |
|                                         | <i>Cyanobium</i> sp. LEGE 06134          | M                                       | Beach, Moledo, Portugal                    |                            |
|                                         | <i>Cyanobium</i> sp. LEGE 06137          | M                                       | Beach, Lavadores, Portugal                 |                            |
|                                         | <i>Cyanobium</i> sp. LEGE 06138          | M                                       | Beach, Aguda, Portugal                     |                            |
|                                         | <i>Cyanobium</i> sp. LEGE 06140          | M                                       | Beach, Aguda, Portugal                     |                            |
|                                         | <i>Cyanobium</i> sp. LEGE 07153          | M                                       | Beach, Martinhal, Portugal                 |                            |
|                                         | <i>Cyanobium</i> sp. LEGE 07183          | M                                       | Beach, Olhos de Água, Portugal             |                            |
|                                         | cf. <i>Gloeocapsa</i> sp. LEGE 06192     | M                                       | Beach, Burgau, Portugal                    |                            |
|                                         | <i>Microcystis aeruginosa</i> LEGE 08355 | F                                       | Reservoir, Torrão dam, Portugal            |                            |
|                                         | <i>Microcystis aeruginosa</i> LEGE 91095 | F                                       | Reservoir, Torrão dam, Portugal            |                            |
|                                         | <i>Microcystis aeruginosa</i> LEGE 91338 | F                                       | Coastal lagoon, Barrinha de Mira, Portugal |                            |
|                                         | <i>Microcystis aeruginosa</i> LEGE 91344 | F                                       | Pond, Lagoa dos Teixoeiros, Portugal       |                            |
|                                         | <i>Microcystis aeruginosa</i> LEGE 91347 | F                                       | Reservoir, Bemposta dam, Portugal          |                            |
|                                         | <i>Microcystis aeruginosa</i> LEGE 91351 | F                                       | Pond, Lagoa das Braças, Portugal           |                            |
|                                         | <i>Microcystis aeruginosa</i> LMECYA 1   | F                                       | Reservoir, Montargil dam, Portugal         |                            |
|                                         | <i>Microcystis</i> sp. AM VIVO A         | F                                       | Tâmega river, Portugal                     |                            |
|                                         | <i>Microcystis</i> sp. IZANCYA 45        | F                                       | Pond, Lagoa da Vela, Portugal              |                            |
|                                         | <i>Microcystis</i> sp. LEGE 00258        | F                                       | Marco de Canaveses, Portugal               |                            |
|                                         | <i>Microcystis</i> sp. LEGE 03282        | F                                       | Reservoir, Montargil dam, Portugal         |                            |
|                                         | <i>Microcystis</i> sp. LEGE 08328        | F                                       | Lake, Zumpango, Mexico                     |                            |
|                                         | <i>Microcystis</i> sp. LEGE 08329        | F                                       | Man-made channel, Cuemanco, Mexico         |                            |
|                                         | <i>Microcystis</i> sp. LEGE 08330        | F                                       | Artificial lake, Chapultepec, Mexico       |                            |
|                                         | <i>Microcystis</i> sp. LEGE 08331        | F                                       | Man-made channel, Cuemanco, Mexico         |                            |
|                                         | <i>Microcystis</i> sp. LEGE 08332        | F                                       | Man-made channel, Cuemanco, Mexico         |                            |
|                                         | <i>Synechococcus nidulans</i> LEGE 06156 | M                                       | Beach, Burgau, Portugal                    |                            |
|                                         | <i>Synechococcus nidulans</i> LEGE 07186 | M                                       | Beach, Martinhal, Portugal                 |                            |
|                                         | <i>Synechococcus</i> sp. LEGE 06006      | M                                       | Beach, São Pedro de Moel, Portugal         |                            |
|                                         | <i>Synechococcus</i> sp. LEGE 06026      | M                                       | Beach, Empa, Portugal                      |                            |
|                                         | <i>Synechococcus</i> sp. LEGE 06139      | M                                       | Beach, Aguda, Portugal                     |                            |
|                                         | <i>Synechocystis salina</i> LEGE 07173   | M                                       | Beach, Olhos de Água, Portugal             |                            |
|                                         | <i>Synechocystis</i> sp. LEGE 00037      | M                                       | Beach, Moledo, Portugal                    |                            |
|                                         | <i>Synechocystis</i> sp. LEGE 07211      | F                                       | WWTP, Febros river, Portugal               |                            |
|                                         | Pleurocapsales                           | <i>Chroococcidiopsis</i> sp. LEGE 06147 | M                                          | Beach, Moledo, Portugal    |
|                                         |                                          | <i>Chroococcidiopsis</i> sp. LEGE 06174 | M                                          | Beach, Aguda, Portugal     |
|                                         |                                          | <i>Chroococcopsis</i> sp. LEGE 07161    | M                                          | Beach, Martinhal, Portugal |
|                                         |                                          | <i>Chroococcopsis</i> sp. LEGE 07187    | M                                          | Beach, Moledo, Portugal    |
|                                         |                                          | <i>Hyella</i> sp. LEGE 07179            | M                                          | Beach, Moledo, Portugal    |
|                                         | Oscillatoriales                          | <i>Leptolyngbya mycoidea</i> LEGE 06108 | M                                          | Beach, Luz, Portugal       |
| <i>Leptolyngbya mycoidea</i> LEGE 06118 |                                          | M                                       | Beach, Luz, Portugal                       |                            |
| <i>Leptolyngbya mycoidea</i> LEGE 07157 |                                          | M                                       | Beach, Lavadores, Portugal                 |                            |
| <i>Leptolyngbya saxicola</i> LEGE 06133 |                                          | M                                       | Beach, Moledo, Portugal                    |                            |

|            |                                                                             |   |                                              |
|------------|-----------------------------------------------------------------------------|---|----------------------------------------------|
|            | <i>Leptolyngbya saxicola</i> LEGE 07132                                     | M | Beach, Luz, Portugal                         |
|            | <i>Leptolyngbya saxicola</i> LEGE 07170                                     | M | Beach, Olhos de Água, Portugal               |
|            | <i>Leptolyngbya</i> sp. LEGE 06009                                          | M | Beach, Foz do Arelho, Portugal               |
|            | <i>Leptolyngbya</i> sp. LEGE 06188                                          | M | Beach, Lavadores, Portugal                   |
|            | <i>Leptolyngbya</i> sp. LEGE 06362                                          | F | WWTP, Febros river, Portugal                 |
|            | <i>Nodosilinea nodulosa</i> LEGE 06152                                      | M | Beach, Lavadores, Portugal                   |
|            | <i>Nodosilinea</i> sp. LEGE 06120                                           | M | Beach, Luz, Portugal                         |
|            | <i>Oscillatoria limnetica</i> LEGE 00237                                    | F | WTP, Mort água, Portugal                     |
|            | <i>Oscillatoria</i> sp. LEGE 03272                                          | F | Coastal lagoon, Lagoa dos Salgados, Portugal |
|            | <i>Oscillatoria</i> sp. LEGE 05292                                          | F | Freshwater aquarium                          |
|            | <i>Phormidium</i> sp. LEGE 06078                                            | E | Douro estuary, Portugal                      |
|            | <i>Phormidium</i> sp. LEGE 06204                                            | F | WWTP, Febros river, Portugal                 |
|            | <i>Phormidium</i> sp. LEGE 06363                                            | F | WWTP, Febros river, Portugal                 |
|            | <i>Phormidium</i> sp. LEGE 07215                                            | F | WWTP, Febros river, Portugal                 |
|            | <i>Planktothrix</i> sp. LEGE 07227                                          | F | WWTP, Febros river, Portugal                 |
|            | <i>Planktothrix</i> sp. LEGE 08334                                          | F | Lake, Zumpango, Mexico                       |
|            | <i>Planktothrix</i> sp. LEGE 08335                                          | F | Lake, Zumpango, Mexico                       |
|            | <i>Plectonema</i> cf. <i>radiosum</i> LEGE 06114                            | M | Beach, Luz, Portugal                         |
|            | <i>Pseudanabaena</i> cf. <i>curta</i> LEGE 07169                            | M | Beach, Aguda, Portugal                       |
|            | <i>Pseudanabaena</i> cf. <i>frigida</i> LEGE 06119                          | M | Beach, Burgau, Portugal                      |
|            | <i>Pseudanabaena</i> cf. <i>frigida</i> LEGE 06144                          | M | Beach, Burgau, Portugal                      |
|            | <i>Pseudanabaena</i> sp. LEGE 06116                                         | M | Beach, Martinhal, Portugal                   |
|            | <i>Romeria</i> sp. LEGE 06013                                               | M | Beach, Arelho, Portugal                      |
|            | <i>Schizothrix</i> aff. <i>septentrionalis</i> LEGE 07164                   | M | Beach, Moledo, Portugal                      |
|            | Unidentified <i>Pseudanabaenaceae</i> LEGE 06148                            | M | Beach, Moledo, Portugal                      |
| Nostocales | <i>Anabaena</i> cf. <i>cylindrica</i> LEGE 00235                            | F | Reservoir, Maranhão dam, Portugal            |
|            | <i>Anabaena</i> sp. LEGE 00240                                              | F | Reservoir, Maranhão dam, Portugal            |
|            | <i>Anabaena</i> sp. LEGE 04288                                              | F | Marco de Canaveses, Portugal                 |
|            | <i>Aphanizomenon gracile</i> LMECYA 40                                      | F | Crato, Portugal                              |
|            | <i>Aphanizomenon</i> (= <i>Cuspidothrix</i> ) <i>issatchenkoi</i> LMECYA 31 | F | Reservoir, Montargil dam, Portugal           |
|            | <i>Aphanizomenon</i> sp. LEGE 00251                                         | F | T água, Portugal                             |
|            | <i>Aphanizomenon</i> sp. LEGE 00238                                         | F | Reservoir, Maranhão dam, Portugal            |
|            | <i>Calothrix</i> sp. LEGE 06100                                             | M | Beach, Lavadores, Portugal                   |
|            | <i>Calothrix</i> sp. LEGE 06122                                             | M | Beach, S. Bartolomeu do Mar, Portugal        |
|            | <i>Calothrix</i> sp. LEGE 07177                                             | M | Beach, Martinhal, Portugal                   |
|            | <i>Cuspidothrix</i> sp. LEGE 03284                                          | F | Montargil, Portugal                          |
|            | <i>Cylindrospermopsis raciborskii</i> LEGE 97047                            | F | Queensland, Australia                        |
|            | <i>Cylindrospermopsis raciborskii</i> LEGE 99045                            | F | Reservoir, Portugal                          |
|            | <i>Nodularia</i> sp. LEGE 06071                                             | E | Vouga estuary, Portugal                      |
|            | <i>Nostoc</i> sp. LEGE 06150                                                | M | Beach, S. Bartolomeu do Mar, Portugal        |
|            | <i>Rivularia</i> sp. LEGE 07159                                             | M | Beach, Burgau, Portugal                      |
|            | <i>Scytonema</i> sp. LEGE 07182                                             | M | Beach, Moledo, Portugal                      |
|            | <i>Sphaerospermopsis</i> sp. LEGE 00249                                     | F | Reservoir, Maranhão dam, Portugal            |

<sup>a</sup> Strain in bold refers to positive control used in PCR reactions; strains underlined refer to lost cultures (*i.e.*, gDNA from lyophilized biomass); <sup>b</sup> M—marine, F—freshwater, E—estuarine; <sup>c</sup> WWTP—Wastewater Treatment Plant, WTP—Water Treatment Plant.

**Figure S1.** Schematic diagrams of representative cyanobactin gene clusters. (1) Example of the arrangement of a canonical cyanobactin gene cluster, *pat*, featuring the set of genes present in these pathways. A and G genes, coding for two proteases; E-gene, precursor peptide; B and C genes, coding for short conserved hypothetical proteins of unknown function. D and F genes, as well as an oxidase domain (in G-gene) lead, respectively, to heterocyclization, prenylation and oxidation of the resulting peptides; (2) Anacyclamide gene cluster, representing the genetic organization of cyanobactin pathways, lacking heterocyclases and oxidases; (3) Trichamide gene cluster, enlightening the presence of the oxidase domain in a separate open reading frame; (4) Cyanothecamide gene cluster, revealing the existence of more than one precursor peptide gene. (Adapted from [1]).

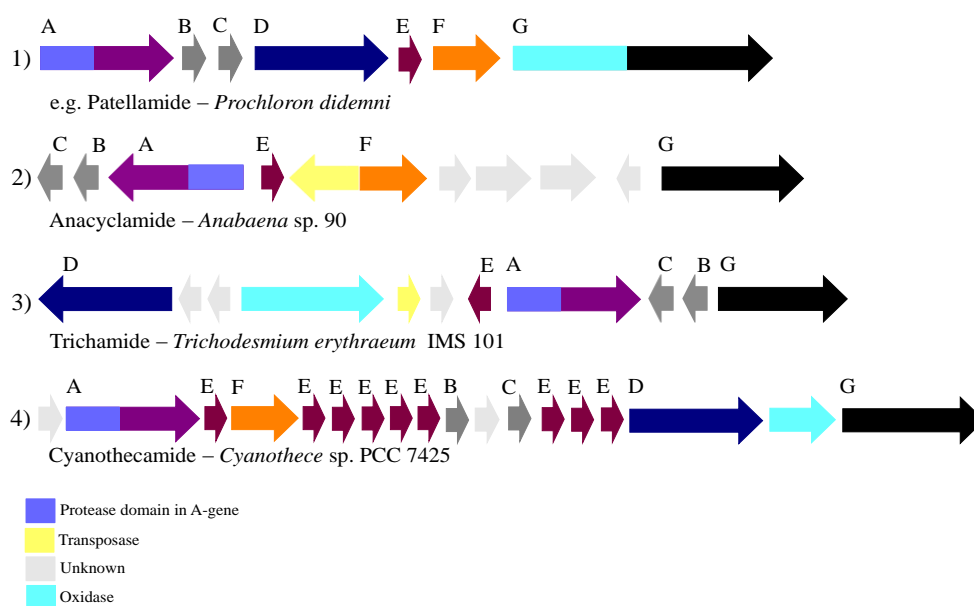

## References

1. Donia, M.S.; Schmidt, E.W. Linking chemistry and genetics in the growing cyanobactin natural products family. *Chem. Biol.* **2011**, *18*, 508–519.

© 2013 by the authors; licensee MDPI, Basel, Switzerland. This article is an open access article distributed under the terms and conditions of the Creative Commons Attribution license (<http://creativecommons.org/licenses/by/3.0/>).
